# Supplementary material for: Global prevalence and epidemiology of Strongyloides stercoralis in dogs: a systematic review and meta-analysis
Source: PubMed Central journal article supplement (PMC8750836; doi:10.1186/s13071-021-05135-0), 2022-01-10

Additional file 2: Figure S1. Sub-group analysis of the prevalence of *Strongyloides stercoralis* in included studies based on country.

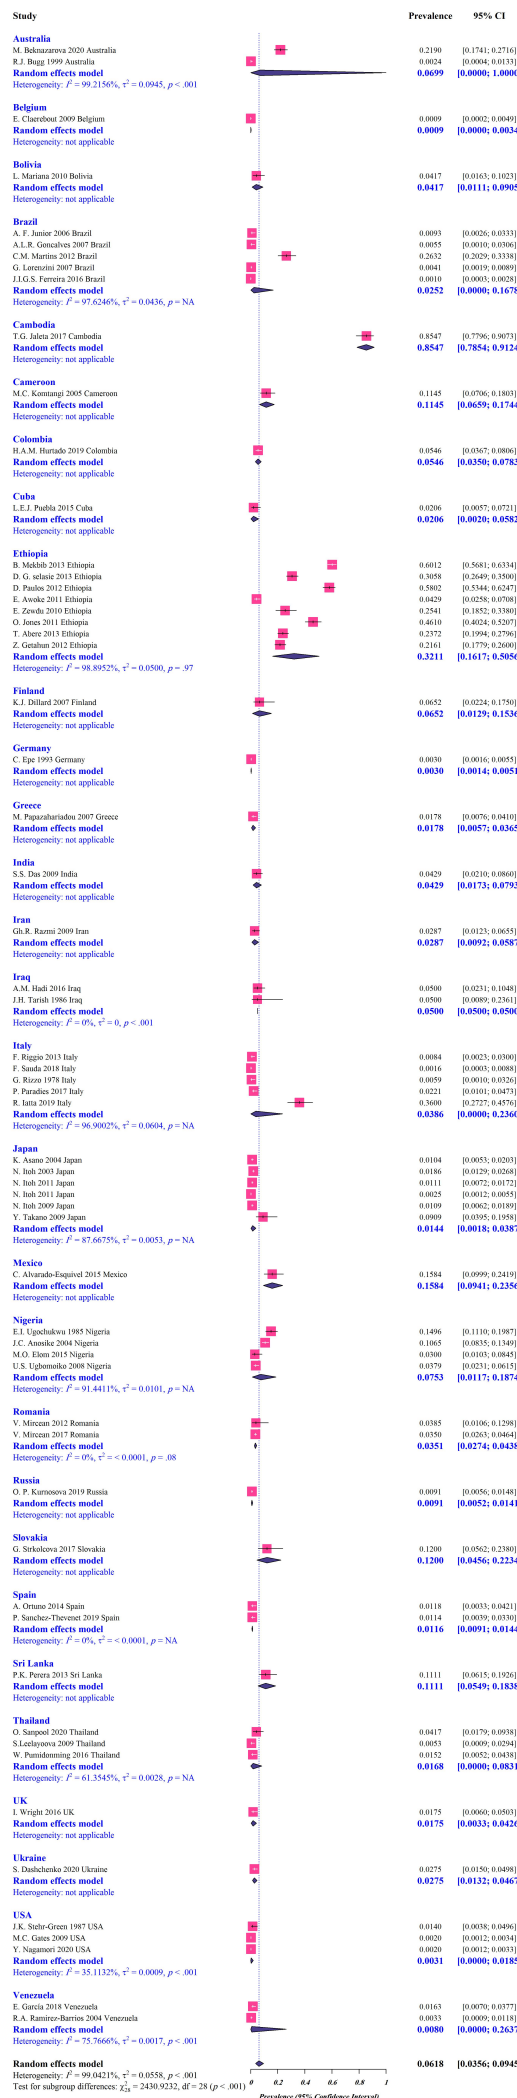

Supplement: 13071_2021_5135_MOESM2_ESM.pdf [file 13071_2021_5135_MOESM2_ESM.pdf]
